# Supplementary material for: An electrostatic repulsion strategy for a highly selective and sensitive “switch-on” fluorescence sensor of ascorbic acid based on the cysteamine-coated CdTe quantum dots and cerium(iv)
Source: Royal Society of Chemistry journal article supplement (doi:10.1039/d1nj00145k), 2021-01-01
Supplement: d1nj00145k1.pdf [file d1nj00145k1.pdf]

## Electronic Supplementary Information

### Electrostatic repulsion strategy for highly selective and sensitive “switch–on” fluorescence sensor of ascorbic acid based on the cysteamine-coated CdTe quantum dots and cerium (IV)

Yifei Guo<sup>a</sup>, Jingjing Du<sup>a</sup>, Jianjun Li<sup>a</sup>, Ran Yang<sup>\*a, b</sup>, Peter de B. Harrington<sup>c</sup> and Zhaohui Li<sup>a</sup>

---

<sup>a</sup> College of Chemistry, Green Catalysis Center, Henan Joint International Research Laboratory of Green Construction of Functional Molecules and Their Bioanalytical Applications, Zhengzhou University, Zhengzhou, 450001, P.R. China

<sup>b</sup> Co-construction Collaborative Innovation Center for Chinese Medicine and Respiratory Diseases by Henan & Education Ministry of P.R. China

<sup>c</sup> Center for Intelligent Chemical Instrumentation, Department of Chemistry and Biochemistry, OHIO University, Athens, OH 45701-2979 USA

Prof. Dr. Ran Yang. E-mail address: yangran@zzu.edu.cn

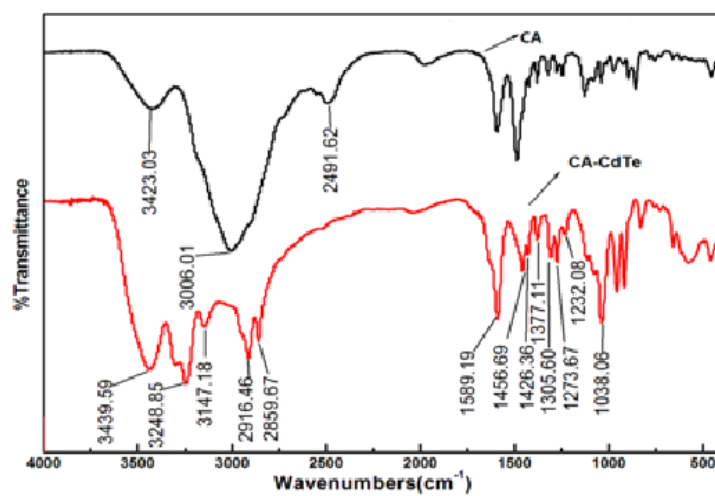

**Fig. S1** FT-IR spectra of CA and CA-CdTe QDs.

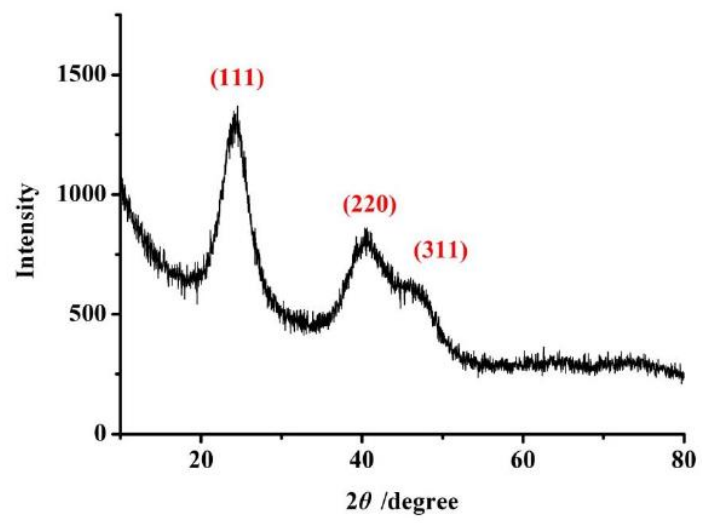

**Fig. S2** X-ray diffraction pattern of CA-CdTe QDs.

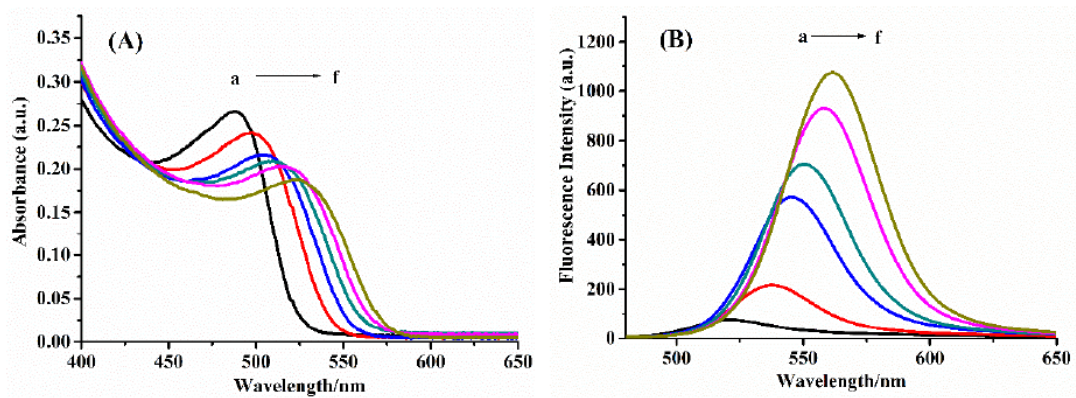

**Fig. S3** UV (A) and fluorescence (B) spectra of CA-CdTe QDs (a→f means 0.5 h, 1.0 h, 2.0 h, 3.0 h, 3.5 h, 4.0 h, respectively).
